# Supplementary material for: Three-dimensional Mn-doped Zn2GeO4 nanosheet array hierarchical nanostructures anchored on porous Ni foam as binder-free and carbon-free lithium-ion battery anodes with enhanced electrochemical performance
Source: Royal Society of Chemistry journal article supplement (doi:10.1039/c5ta04648c), 2015-01-01
Supplement: c5ta04648c1.pdf [file c5ta04648c1.pdf]

## Supporting Information

### Three-dimensional Mn-doped $\text{Zn}_2\text{GeO}_4$ nanosheet array hierarchical nanostructures anchored on porous Ni foam as binder-free and carbon-free lithium-ion battery anodes with enhanced electrochemical performance

Qun Li<sup>a,b</sup>, Xiangguang Miao, Chengxiang Wang, and Longwei Yin<sup>a</sup>,

<sup>a</sup>Key Laboratory for Liquid-Solid Structural Evolution and Processing of Materials, Ministry of Education, School of Materials Science and Engineering, Shandong University, Jinan 250061, P. R. China

<sup>b</sup>College of Chemistry and Chemical Engineering, Taishan University, Tai'an 271021, P. R. China

Email: [yinlw@sdu.edu.cn](mailto:yinlw@sdu.edu.cn)

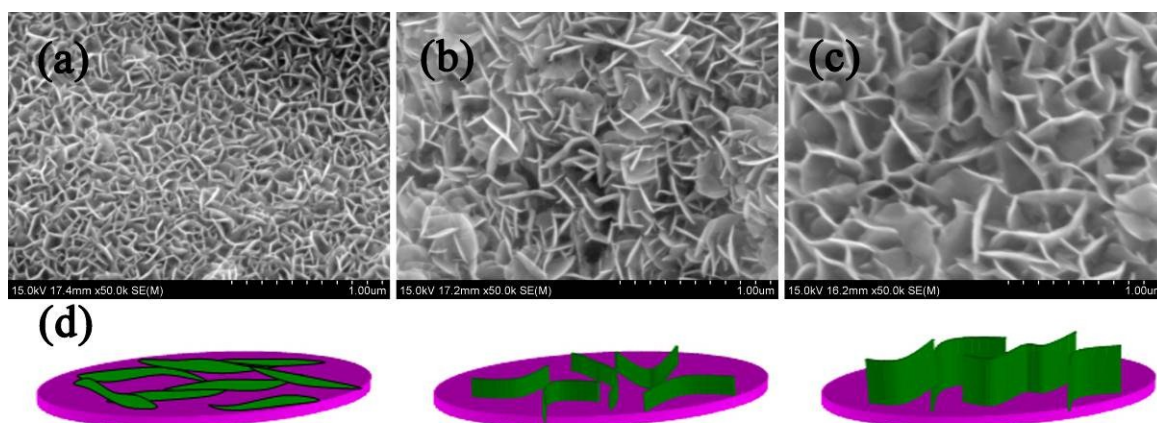

**Fig. S1.** SEM images of the 7%Mn- $\text{Zn}_2\text{GeO}_4$  sample at different action time, (a) 12h, (b) 24h, and (c) 48h.

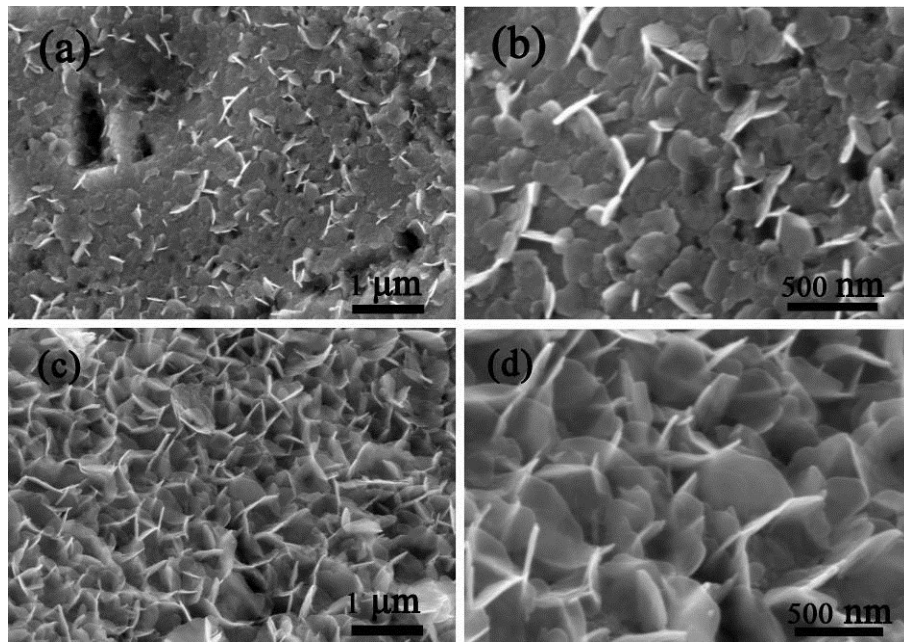

**Fig. S2.** SEM images of (a), (b) 1%Mn-Zn<sub>2</sub>GeO<sub>4</sub> and (c), (d) 9%Mn-Zn<sub>2</sub>GeO<sub>4</sub> sample.

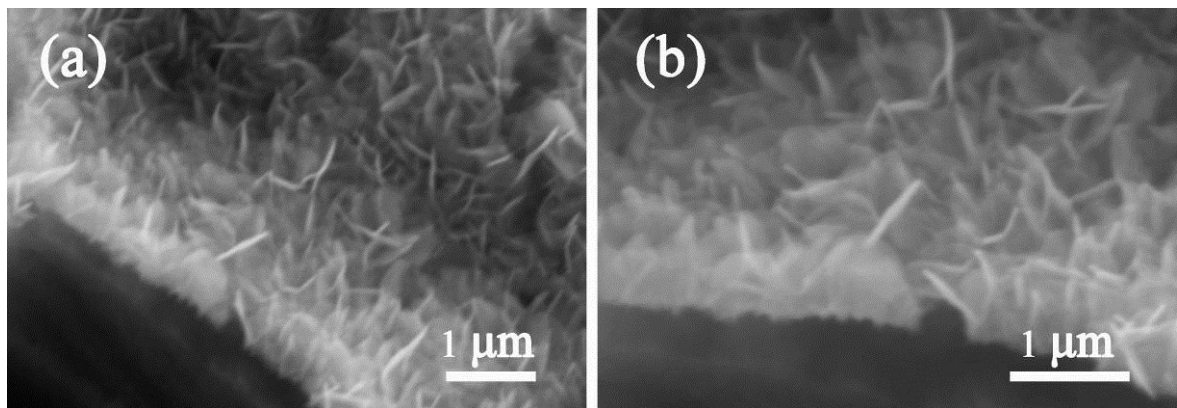

**Fig. S3.** Cross-section SEM image of 7%Mn-Zn<sub>2</sub>GeO<sub>4</sub> sample.

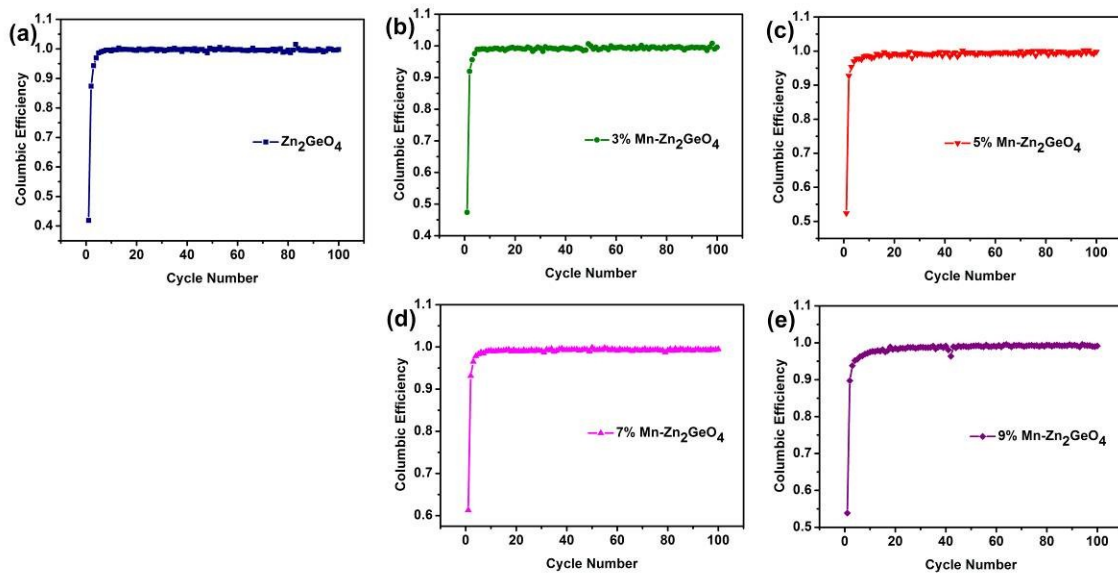

**Fig. S4.** Coulomb efficiency of the synthesized samples within the 100 discharge/charge cycles.

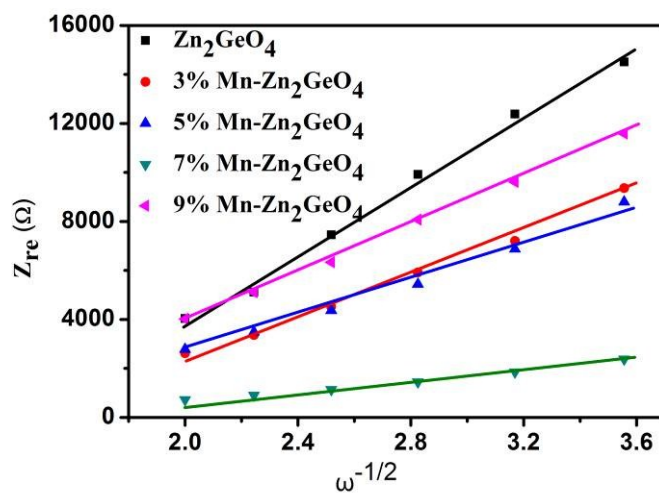

**Fig. S5.** Relationship between  $Z_{re}$  and  $\omega^{-1/2}$  in the low-frequency region

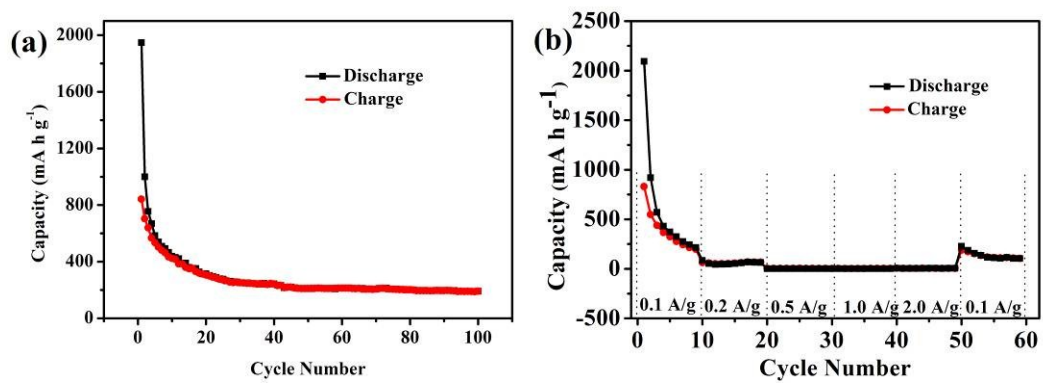

**Fig. S6.** Cycling and rate performance of the pristine  $\text{Zn}_2\text{GeO}_4$  nanowire sample not on the Ni foam.

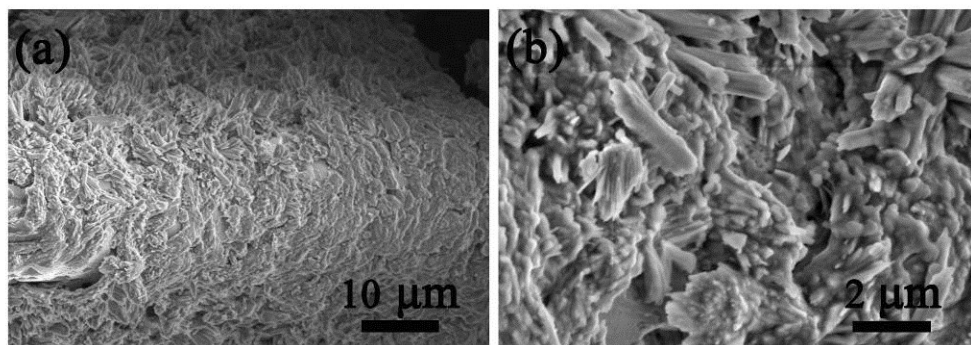

**Fig. S7.** SEM images of  $\text{Zn}_2\text{GeO}_4$  sample grown on Ni foam after 10 cycles at the current density of 100  $\text{mA g}^{-1}$ .

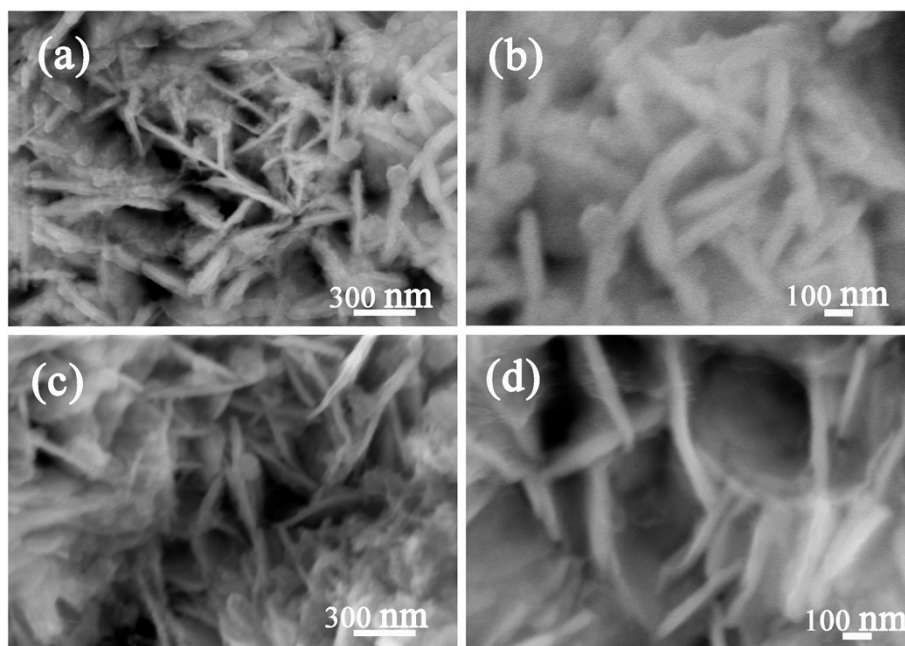

**Fig. S8.** SEM images of the Mn doped  $\text{Zn}_2\text{GeO}_4$  nanosheet sample at lithiated state (a), (b) and delithiated state (c), (d) after 100 cycles at the current density of  $100 \text{ mA g}^{-1}$ . The thickness of nanosheet at these two states was all larger than that of state before cycling because of the pulverization effect. The electrodes can still maintain its network as well as porous structures after charging, suggesting that the nanosheet structure has a high stability.
